# Supplementary material for: Sterols from Mytilidae Show Anti-Aging and Neuroprotective Effects via Anti-Oxidative Activity
Source: MDPI journal article supplement (doi:10.3390/ijms151221660), 2014-11-25

## Supplementary Information

**Figure S1.** Anti-aging activities of the four sterol compounds at doses of 0.3, 1, 3, 10  $\mu\text{M}$ . **(A)** Effect of cholesterol on the replicative lifespan of K6001. The average lifespan for the K6001 control group was  $8.0 \pm 0.43$  generations; resveratrol at 10  $\mu\text{M}$ ,  $9.7 \pm 0.44$  \*\*; cholesterol at 0.3  $\mu\text{M}$ ,  $8.9 \pm 0.51$ ; at 1  $\mu\text{M}$ ,  $9.9 \pm 0.47$  \*\*; at 3  $\mu\text{M}$ ,  $9.8 \pm 0.47$  \*\*; and at 10  $\mu\text{M}$ ,  $7.7 \pm 0.37$ ; **(B)** Effect of brassicasterol on the replicative lifespan of K6001. The average lifespan for the K6001 control group was  $8.0 \pm 0.43$  generations; resveratrol at 10  $\mu\text{M}$ ,  $9.7 \pm 0.44$  \*\*; brassicasterol at 0.3  $\mu\text{M}$ ,  $8.4 \pm 0.38$ ; at 1  $\mu\text{M}$ ,  $9.9 \pm 0.47$  \*\*; at 3  $\mu\text{M}$ ,  $9.8 \pm 0.39$  \*\*; and at 10  $\mu\text{M}$ ,  $8.8 \pm 0.39$ ; **(C)** Effect of crinosterol on the replicative lifespan of K6001. The average lifespan for the K6001 control group was  $8.0 \pm 0.43$  generations; resveratrol at 10  $\mu\text{M}$ ,  $9.7 \pm 0.44$  \*\*; crinosterol at 0.3  $\mu\text{M}$ ,  $9.6 \pm 0.47$  \*; at 1  $\mu\text{M}$ ,  $10.0 \pm 0.46$  \*\*; at 3  $\mu\text{M}$ ,  $10.0 \pm 0.51$  \*\*; and at 10  $\mu\text{M}$ ,  $9.2 \pm 0.39$  \*; **(D)** Effect of 24-methylenecholesterol on the replicative lifespan of K6001. The average lifespan for the K6001 control group was  $8.0 \pm 0.43$  generations; resveratrol at 10  $\mu\text{M}$ ,  $9.7 \pm 0.44$  \*\*; 24-methylenecholesterol at 0.3  $\mu\text{M}$ ,  $9.6 \pm 0.51$  \*; at 1  $\mu\text{M}$ ,  $9.8 \pm 0.43$  \*\*; at 3  $\mu\text{M}$ ,  $9.8 \pm 0.46$  \*\*; and at 10  $\mu\text{M}$ ,  $7.8 \pm 0.35$ . \*  $p < 0.05$ , and \*\*  $p < 0.01$  indicate statistically significant difference.

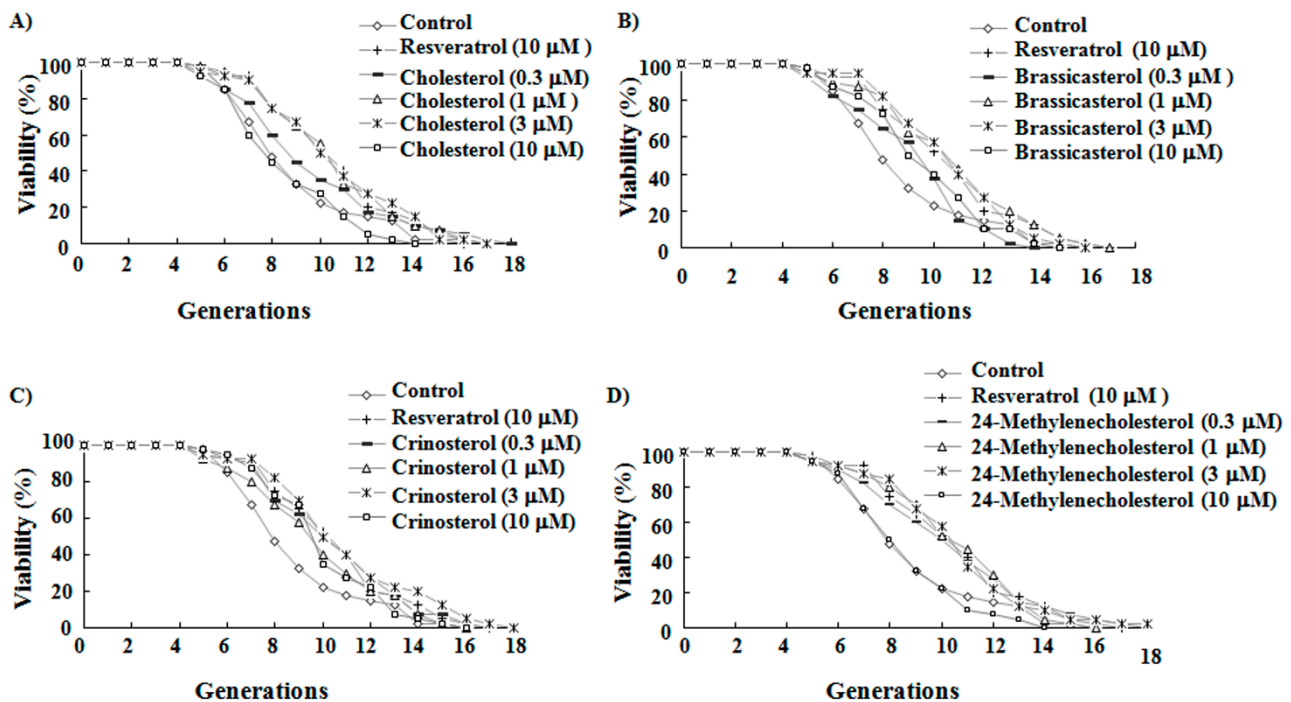

**Figure S2.** (A)  $^1\text{H}$  NMR of cholesterol (500 MHz,  $\text{CDCl}_3$ ) and (B)  $^{13}\text{C}$  NMR of cholesterol (125 MHz,  $\text{CDCl}_3$ ).

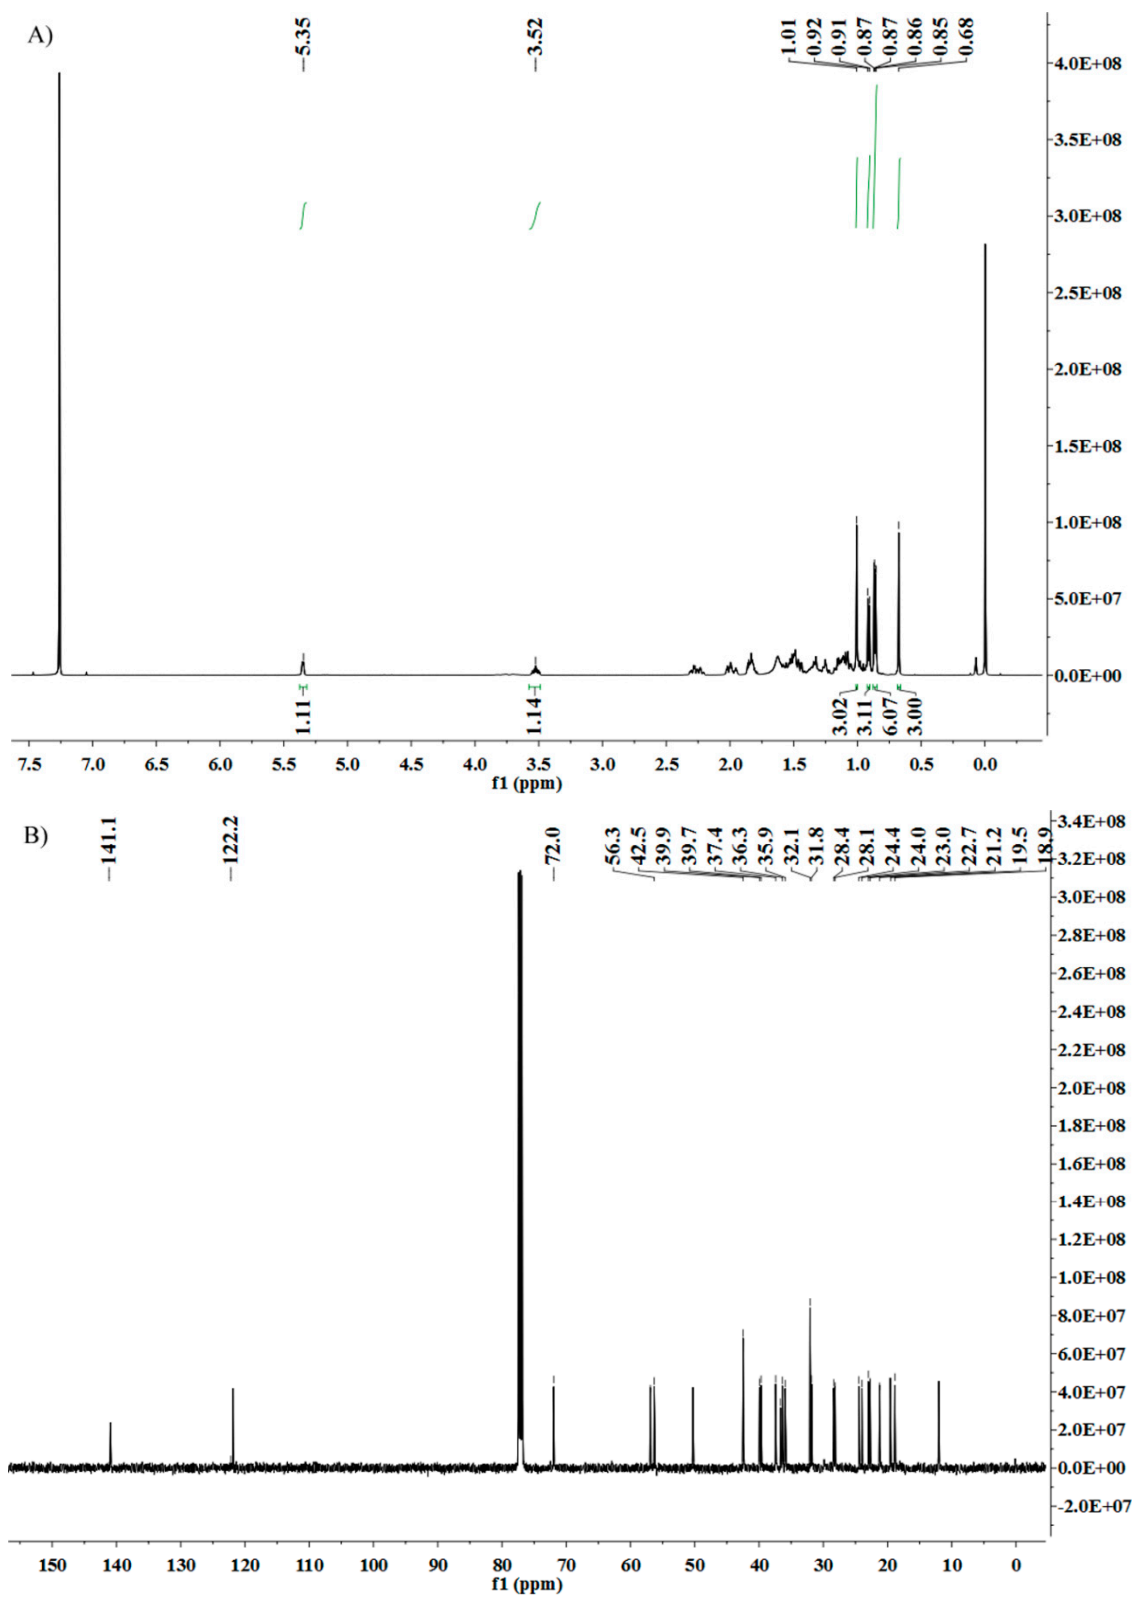

**Figure S3.** (A)  $^1\text{H}$  NMR of brassicasterol (500 MHz,  $\text{CDCl}_3$ ) and (B)  $^{13}\text{C}$  NMR of brassicasterol (125 MHz,  $\text{CDCl}_3$ ).

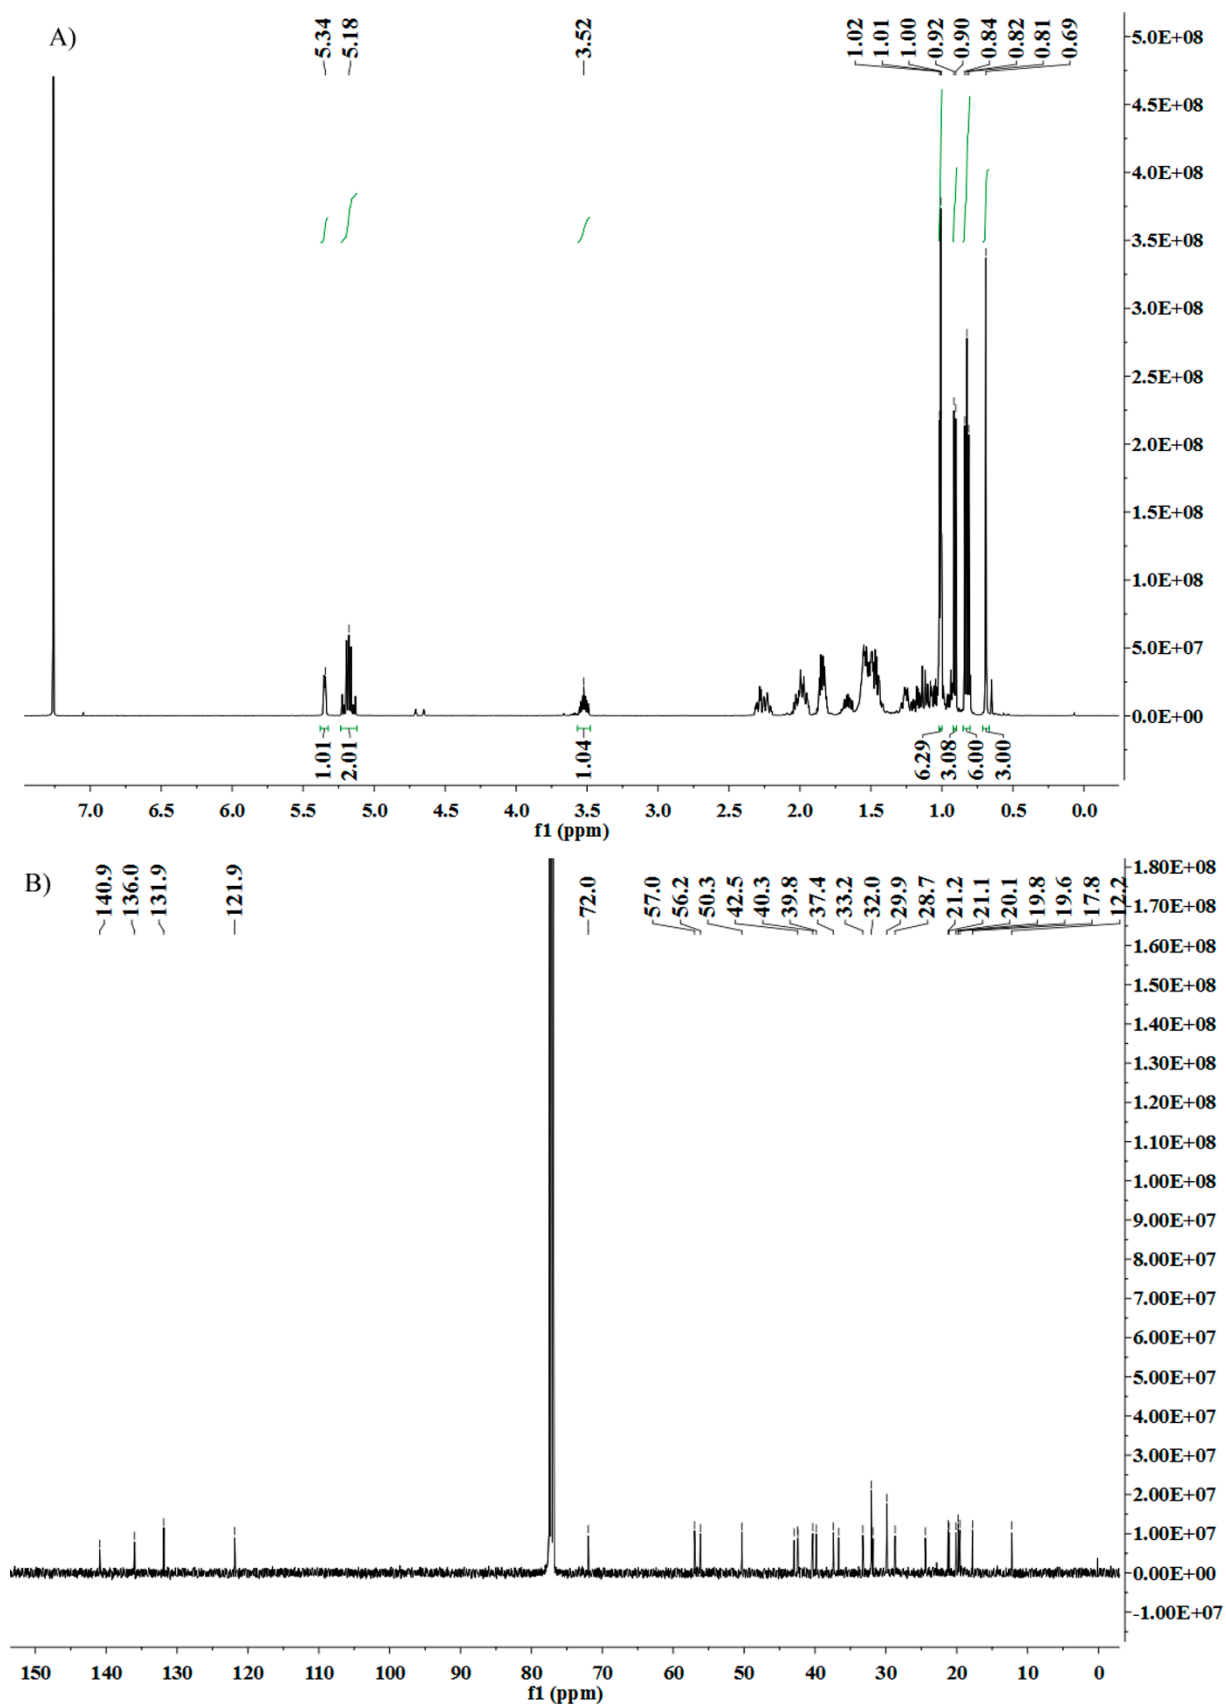

**Figure S4.** (A)  $^1\text{H}$  NMR of crinosterol (500 MHz,  $\text{CDCl}_3$ ) and (B)  $^{13}\text{C}$  NMR of crinosterol (125 MHz,  $\text{CDCl}_3$ ).

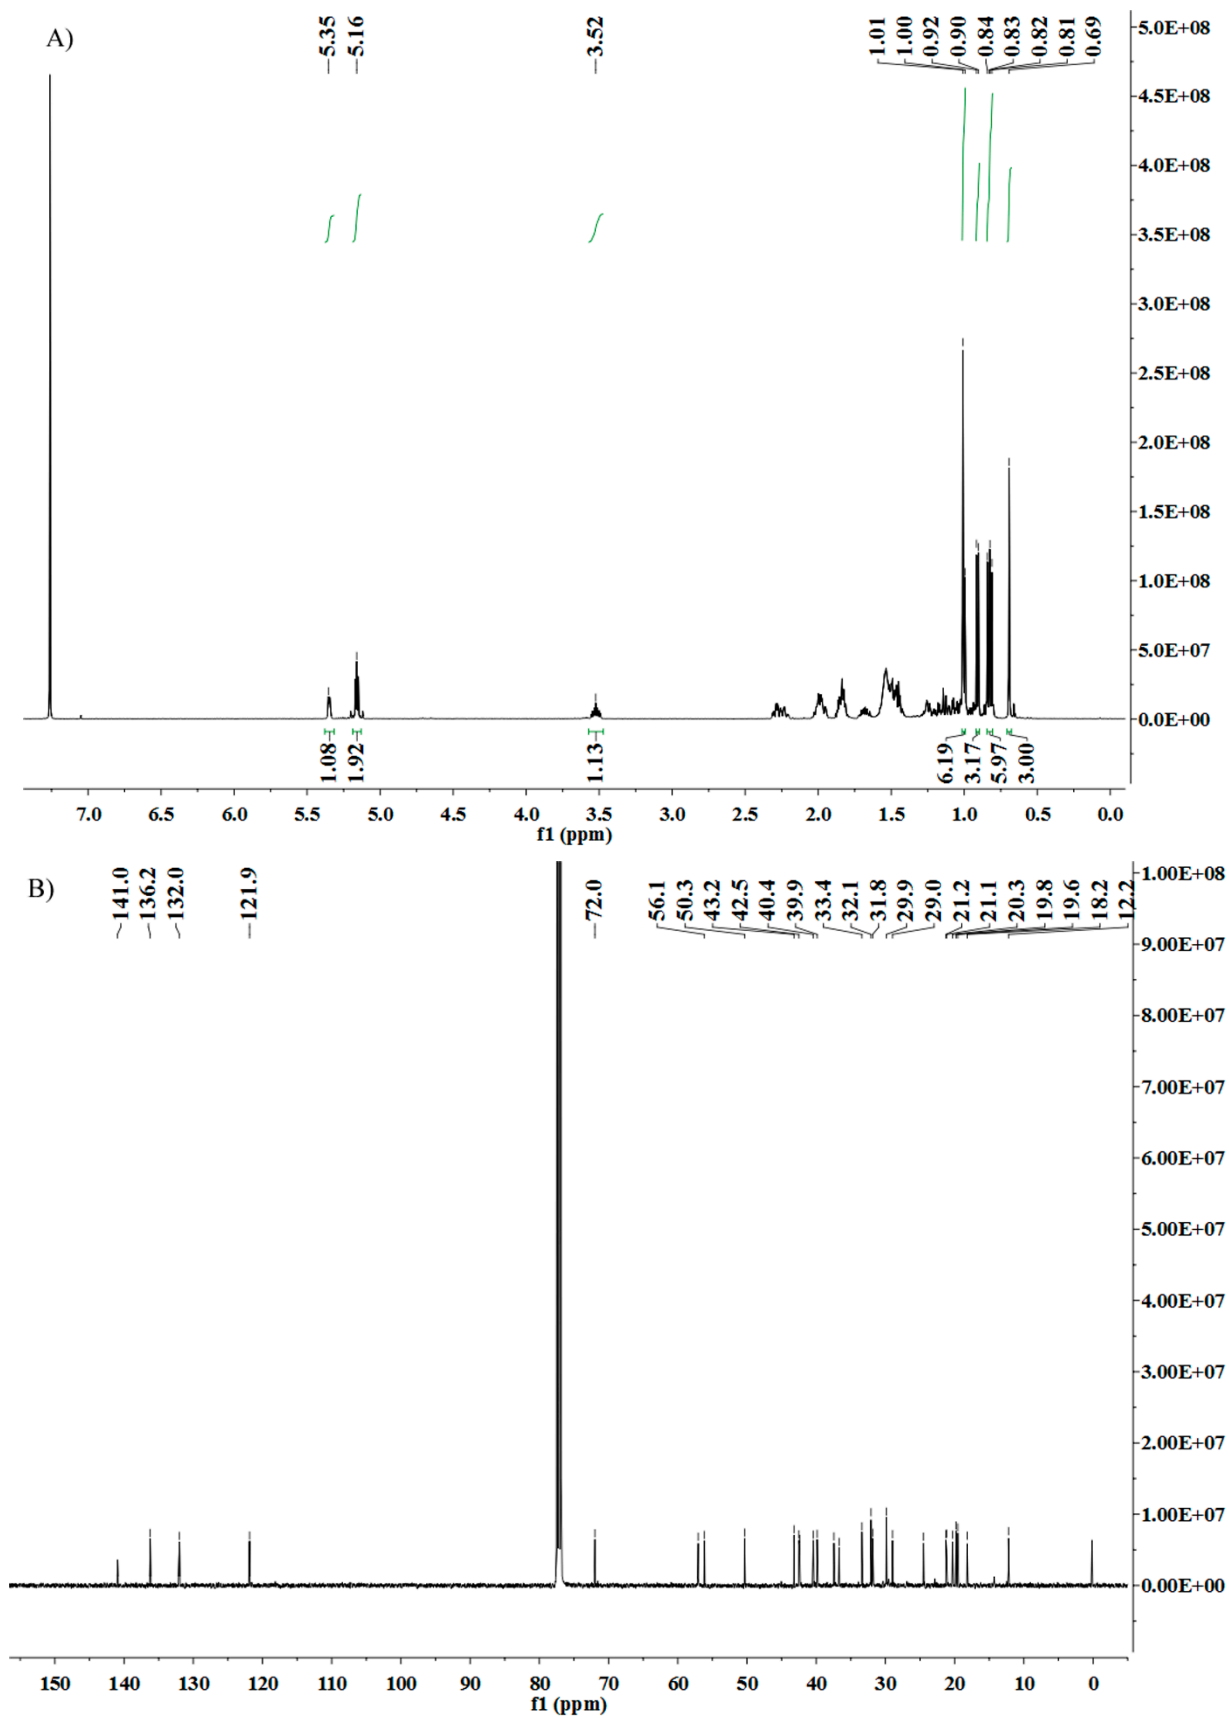

**Figure S5.** (A)  $^1\text{H}$  NMR of 24-methylenecholesterol (500 MHz,  $\text{CDCl}_3$ ) and (B)  $^{13}\text{C}$  NMR of 24-methylenecholesterol (125 MHz,  $\text{CDCl}_3$ ).

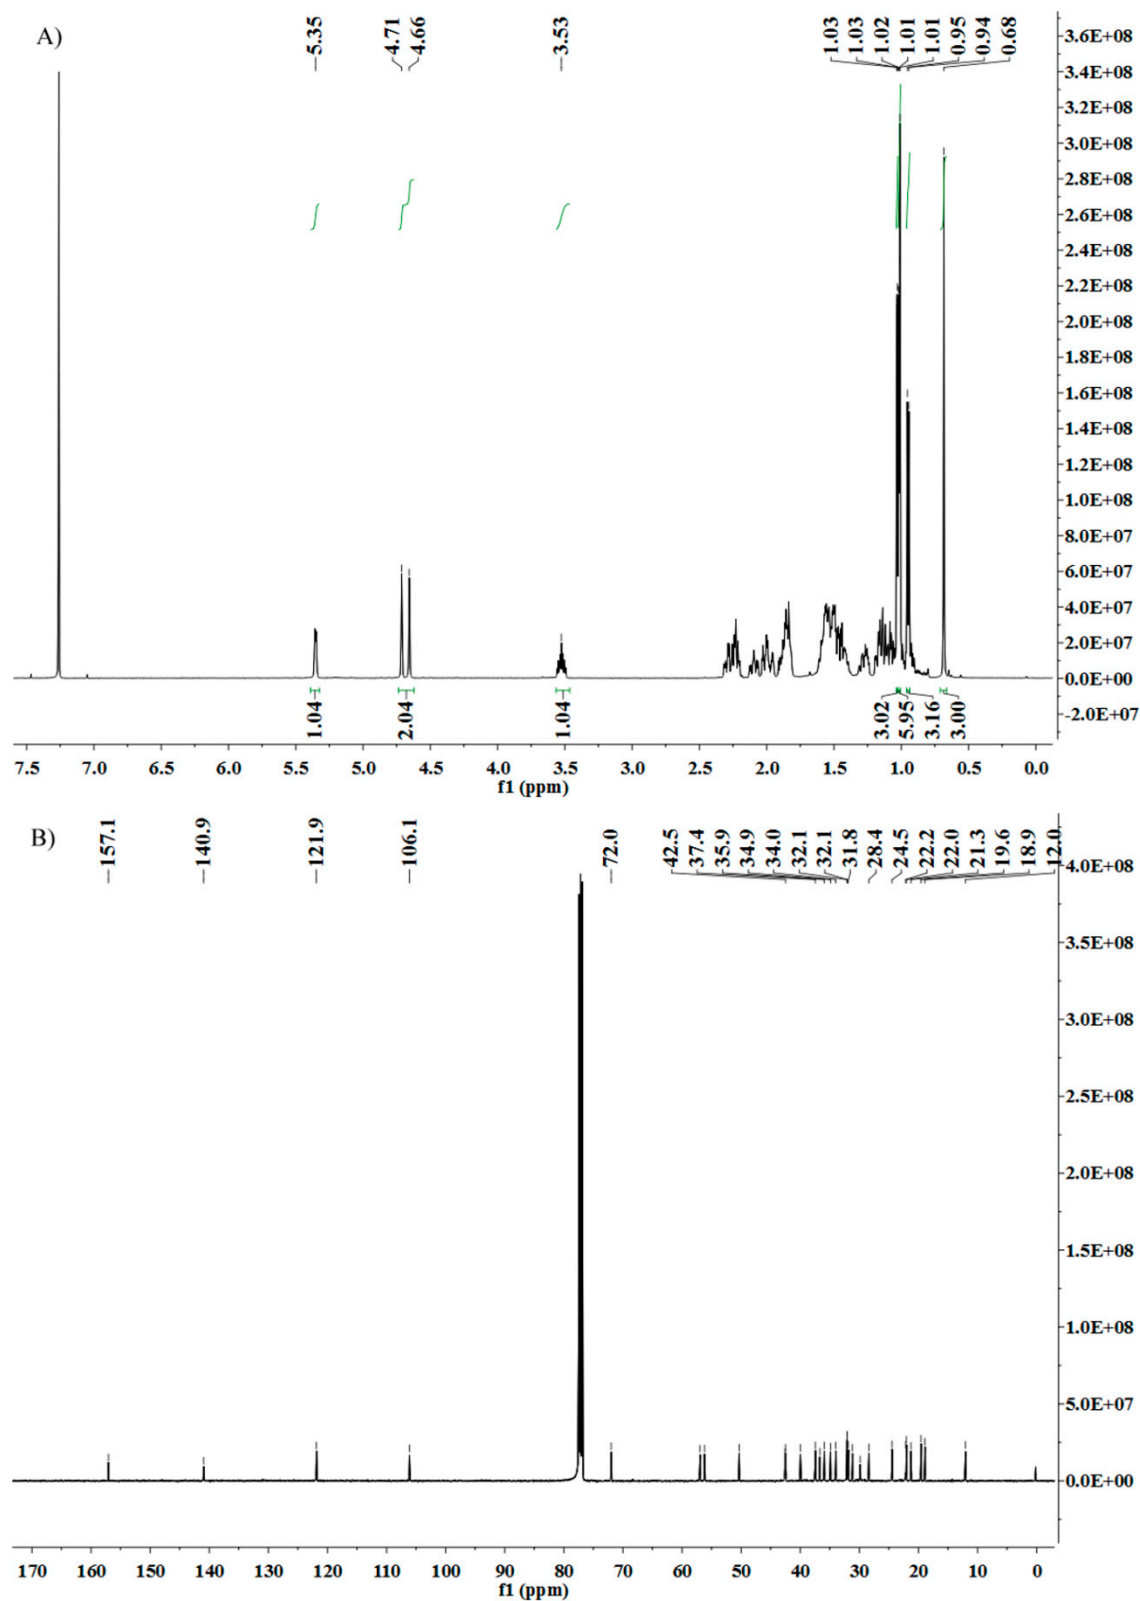

**Figure S6.** LC-MS basepeak chromatogram of SF (A) and HRMS spectra of the four compounds: cholesterol (B); brassicasterol (C); crinosterol (D); 24-methylenecholesterol (E).

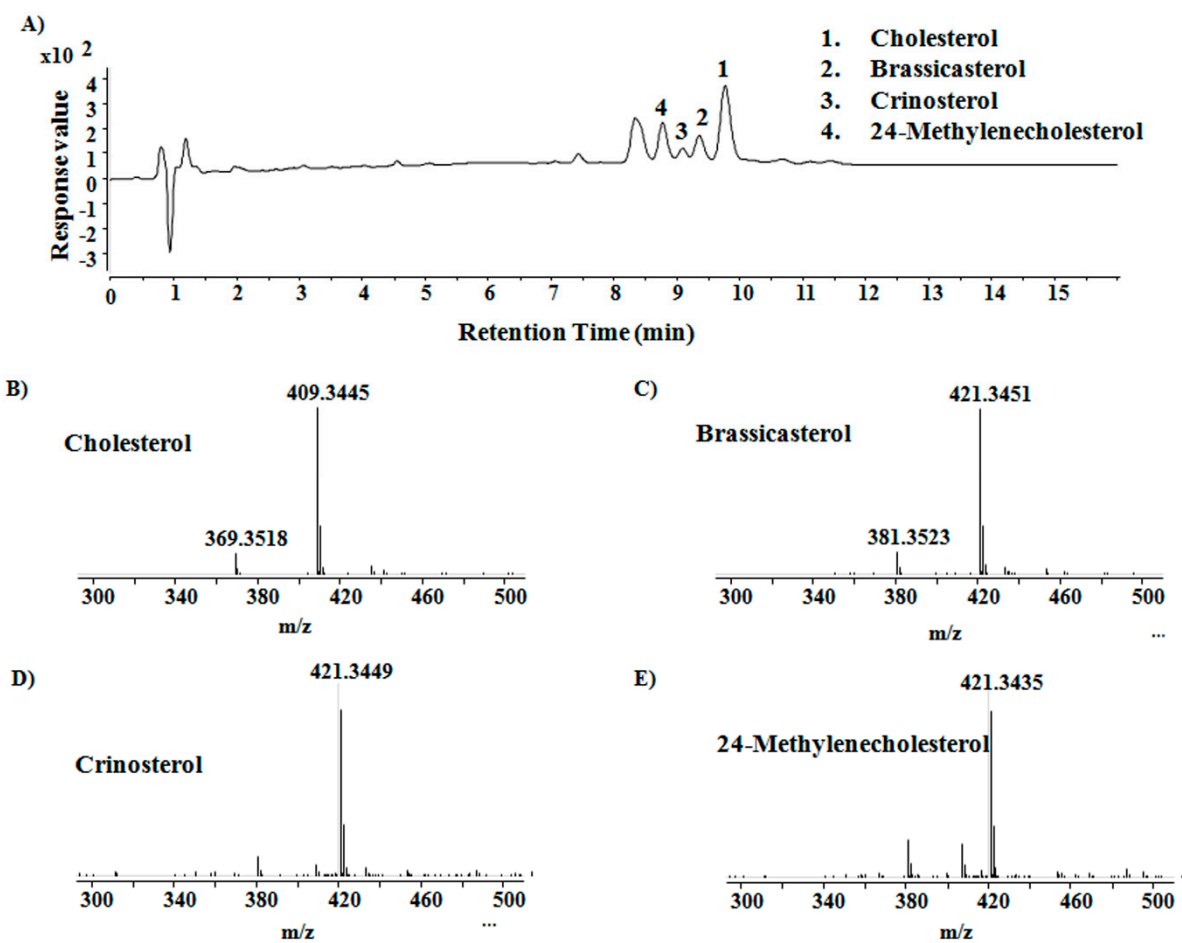

Supplement: s1 [file s1]
